# Supplementary material for: Leveraging Nutrient-Rich Traditional Foods to Improve Diets among Indigenous Populations in India: Value Chain Analysis of Finger Millet and Kionaar Leaves
Source: MDPI journal article supplement (doi:10.3390/foods11233774), 2022-11-23
Supplement: s1 [file s1]

**Supplementary Table S1.** Demographic information for interview participants.

| <b>Tribal group</b> | <b>Participant ID</b> | <b>Block</b> | <b>Village</b> | <b>Age</b> | <b>Gender</b> | <b>Type of Respondent</b>   |
|---------------------|-----------------------|--------------|----------------|------------|---------------|-----------------------------|
| Munda               | 2001                  | Murhu        | Charid         | 35         | Female        | Health and nutrition worker |
| Munda               | 2002                  | Murhu        | Charid         | 55         | Male          | Village head                |
| Munda               | 2003                  | Murhu        | Kudapurti      | 32         | Female        | Health and nutrition worker |
| Munda               | 2004                  | Murhu        | Kudapurti      | 47         | Male          | Village head                |
| Munda               | 2011                  | Murhu        | Charid         | 55         | Male          | Village head                |
| Munda               | 2012                  | Murhu        | Kudapurti      | 60         | Male          | Elder village man           |
| Munda               | 2005                  | Torpa        | Tati           | 52         | Female        | Health and nutrition worker |
| Munda               | 2006                  | Torpa        | Tati           | 55         | Male          | Village head                |
| Munda               | 2007                  | Torpa        | Tati           | 54         | Male          | Village head                |
| Munda               | 2008                  | Torpa        | Nichitpur      | 45         | Female        | Health and nutrition worker |
| Munda               | 2009                  | Torpa        | Nichitpur      | 35         | Female        | Village woman               |
| Munda               | 2010                  | Torpa        | Nichitpur      | 60         | Male          | Village head                |
| Sauria Paharia      | 1001                  | Sunderpahari | Chewo          | 36         | Female        | Health and nutrition worker |
| Sauria Paharia      | 1002                  | Sunderpahari | Chewo          | 24         | Female        | Village woman               |
| Sauria Paharia      | 1003                  | Sunderpahari | Chewo          | 27         | Female        | Village Head                |
| Sauria Paharia      | 1004                  | Sunderpahari | Chewo          | 21         | Female        | Village woman               |
| Sauria Paharia      | 1005                  | Sunderpahari | Chewo          | 65         | Female        | Elderly village woman       |
| Sauria Paharia      | 2001                  | Sunderpahari | Chota Haripur  | 56         | Female        | Elderly village woman       |
| Sauria Paharia      | 2002                  | Sunderpahari | Chota Haripur  | 27         | Female        | Health and nutrition worker |
| Sauria Paharia      | 2003                  | Sunderpahari | Chota Haripur  | 24         | Female        | Village woman               |
| Sauria Paharia      | 2004                  | Sunderpahari | Chota Haripur  | 38         | Female        | Village woman               |
| Sauria Paharia      | 2005                  | Sunderpahari | Chota Haripur  | 35         | Female        | Village woman               |
| Sauria Paharia      | 3001                  | Boarijor     | Kusumghati     | 35         | Female        | Village woman               |
| Sauria Paharia      | 3002                  | Boarijor     | Kusumghati     | 34         | Female        | Health and nutrition worker |
| Sauria Paharia      | 3003                  | Boarijor     | Kusumghati     | 60         | Female        | Elderly village woman       |
| Sauria Paharia      | 3004                  | Boarijor     | Kusumghati     | 32         | Female        | Village woman               |
| Sauria Paharia      | 3005                  | Boarijor     | Kusumghati     | 30         | Female        | Village woman               |
| Sauria Paharia      | 4001                  | Boarijor     | Teletok        | 60         | Female        | Elderly village woman       |
| Sauria Paharia      | 4002                  | Boarijor     | Teletok        | 28         | Female        | Health and nutrition worker |
| Sauria Paharia      | 4003                  | Boarijor     | Teletok        | 24         | Female        | Village woman               |
| Sauria Paharia      | 4004                  | Boarijor     | Teletok        | 32         | Female        | Village woman               |
